# Supplementary material for: PES and transport properties of the He⋯HBr complex from kinetic theory and molecular dynamics simulations
Source: Royal Society of Chemistry journal article supplement (doi:10.1039/d3cp05145e), 2024-01-01
Supplement: d3cp05145e1.zip [file d3cp05145e1.zip]

**Supplementary Information**

**For**

**PES and Transport Properties of He...HBr Complex from Kinetic Theory  
and Molecular Dynamics Simulations**

Fatemeh Aghababaei<sup>a</sup>, Ebrahim Nemati-Kande<sup>a,\*</sup>

<sup>a</sup> *Department of Physical Chemistry, Chemistry Faculty, Urmia University, Urmia, Iran*

---

\*Corresponding author.

E-mail address: [e.nemati@urmia.ac.ir](mailto:e.nemati@urmia.ac.ir)

**Table S1.** Results of the optimization of HBr structure with different basis sets.

| Basis-set          | r(A)   | $\mu$ (Debye) | Q (a.u.)  |          | B (cm <sup>-1</sup> ) |
|--------------------|--------|---------------|-----------|----------|-----------------------|
|                    |        |               | Br        | H        |                       |
| <i>aug-cc-pvDz</i> | 1.4266 | 0.9981        | -0.060163 | 0.060163 | 8.326655              |
| <i>aug-cc-pvTz</i> | 1.4133 | 0.9503        | -0.028062 | 0.028062 | 8.481527              |
| <i>aug-cc-pvQz</i> | 1.4108 | 0.9451        | -0.111888 | 0.111888 | 8.511774              |
| <i>aug-cc-pv5z</i> | 1.4093 | 0.9431        | -0.131755 | 0.131755 | 8.528347              |
| experimental       | 1.4144 | 0.827         |           |          | 8.46488               |

<sup>a</sup> *E*: the energy; *r*: bond length;  $\mu$ : dipole moment; *Q*: atomic charge; *B*: rotational constant.

**Table S2.** Calculated potential value (*U*) and distance (*R*) at minimum points (potential well) of the He-HBr complex at  $\theta = 0^\circ$  using CCSD(T) method and different basis sets.

| Basic set <sup>a</sup> | <i>E</i> (cm <sup>-1</sup> ) | <i>R</i> (A°) |
|------------------------|------------------------------|---------------|
| <i>aug-cc-pvDz</i>     | -20.07                       | 3.6           |
| <i>aug-cc-pvTz</i>     | -28.48                       | 3.5           |
| <i>aug-cc-pvQz</i>     | -32.41                       | 3.5           |
| <i>aug-cc-pv5z</i>     | -34.10                       | 3.4           |
| <i>aug-cc-pvDz-BF</i>  | -35.41                       | 3.4           |
| <i>aug-cc-pvTz-BF</i>  | -35.57                       | 3.4           |
| <i>aug-cc-pvQz-BF</i>  | -35.67                       | 3.4           |
| <i>aug-cc-pv5z-BF</i>  | -35.74                       | 3.4           |

<sup>a</sup> BF is the mid-bond basis functions of 3*s*, 3*p*, 2*d*, 1*f*, and 1*g* with exponents of 0.9, 0.3, and 0.1 for *s* and *p*, 0.6 and 0.2 for *d*, and 0.3 for *f* and *g*.

**Table S3.** Different contributions to the interaction second virial coefficient ( $B_{12}$ ) of He...HBr complex at different temperatures.  $B(0)$  is the classical, and  $B(1)$  values are quantum corrections.

| $T(K)$ | $B_{class}^{(0)}$ | $B_r^{(1)}$ | $B_{a\mu}^{(1)}$ | $B_{el}^{(1)}$ | $B_{q,tot}^{(1)}$ | $B_{12}$ |
|--------|-------------------|-------------|------------------|----------------|-------------------|----------|
| 50     | -22.3153          | 0.9532      | 0.1350           | 1.0571         | 2.1453            | -20.1700 |
| 60     | -9.6081           | 0.6594      | 0.0834           | 0.6612         | 1.4039            | -8.2042  |
| 70     | -1.1966           | 0.4877      | 0.0565           | 0.4521         | 0.9963            | -0.2003  |
| 80     | 4.7349            | 0.3771      | 0.0407           | 0.3286         | 0.7464            | 5.4813   |
| 90     | 9.1103            | 0.3008      | 0.0308           | 0.2496         | 0.5811            | 9.6914   |
| 100    | 12.4483           | 0.2455      | 0.0240           | 0.1960         | 0.4656            | 12.9139  |
| 110    | 15.0621           | 0.2041      | 0.0193           | 0.1580         | 0.3814            | 15.4434  |
| 120    | 17.1514           | 0.1721      | 0.0158           | 0.1301         | 0.3180            | 17.4694  |
| 130    | 18.8497           | 0.1468      | 0.0132           | 0.1090         | 0.2690            | 19.1187  |
| 140    | 20.2493           | 0.1265      | 0.0112           | 0.0926         | 0.2304            | 20.4797  |
| 150    | 21.4160           | 0.1100      | 0.0096           | 0.0797         | 0.1993            | 21.6154  |
| 160    | 22.3981           | 0.0964      | 0.0084           | 0.0693         | 0.1740            | 22.5721  |
| 170    | 23.2315           | 0.0850      | 0.0073           | 0.0608         | 0.1531            | 23.3846  |
| 180    | 23.9436           | 0.0754      | 0.0065           | 0.0538         | 0.1356            | 24.0793  |
| 190    | 24.5558           | 0.0672      | 0.0058           | 0.0479         | 0.1209            | 24.6767  |
| 200    | 25.0848           | 0.0602      | 0.0052           | 0.0430         | 0.1084            | 25.1931  |
| 300    | 27.7925           | 0.0244      | 0.0022           | 0.0183         | 0.0449            | 27.8374  |
| 400    | 28.5038           | 0.0124      | 0.0012           | 0.0101         | 0.0237            | 28.5275  |
| 500    | 28.5644           | 0.0072      | 0.0008           | 0.0064         | 0.0143            | 28.5788  |
| 600    | 28.3674           | 0.0046      | 0.0005           | 0.0044         | 0.0095            | 28.3769  |
| 700    | 28.0604           | 0.0031      | 0.0004           | 0.0032         | 0.0067            | 28.0670  |
| 800    | 27.7072           | 0.0022      | 0.0003           | 0.0025         | 0.0049            | 27.7121  |
| 900    | 27.3382           | 0.0016      | 0.0002           | 0.0019         | 0.0037            | 27.3419  |
| 1000   | 26.9683           | 0.0012      | 0.0002           | 0.0016         | 0.0029            | 26.9713  |
| 1200   | 26.2528           | 0.0007      | 0.0001           | 0.0011         | 0.0019            | 26.2548  |
| 1400   | 25.5856           | 0.0005      | 0.0001           | 0.0008         | 0.0014            | 25.5870  |
| 1600   | 24.9700           | 0.0003      | 0.0001           | 0.0006         | 0.0010            | 24.9710  |
| 1800   | 24.4029           | 0.0002      | 0.0001           | 0.0005         | 0.0008            | 24.4037  |
| 2000   | 23.8795           | 0.0002      | 0.0000           | 0.0004         | 0.0006            | 23.8801  |

**Table S4.** Calculated cross-sections, viscosity  $\eta_{12}$ , and the pair diffusion coefficients  $D_{12}$  as a function of temperature for He...HBr complex calculated using a5zBF basis set. All cross sections are in  $\text{\AA}^2$ .

| $T$ (K) | $\mathfrak{S}^1_D$ | $\mathfrak{S}^2_\eta$ | $\mathfrak{S}_T$ | $\mathfrak{S}_{\text{DPR}}$ | $\mathfrak{S}_{\text{prod}}$ | $\mathfrak{S}_{\text{ROT}}$ | $D_{12}(\text{cm}^2.\text{s}^{-1})$ | $\eta_{12}(\mu\text{Pa.s})$ |
|---------|--------------------|-----------------------|------------------|-----------------------------|------------------------------|-----------------------------|-------------------------------------|-----------------------------|
| 50      | 4.9606             | 0.1623                | 173.2302         | 2882.9723                   | 0.0406                       | 12.0523                     | 0.0255                              | 3.5867                      |
| 100     | 3.9970             | 0.1329                | 12.2429          | 472.8817                    | 0.0328                       | 9.3653                      | 0.0896                              | 6.1981                      |
| 110     | 3.9062             | 0.1301                | 9.6967           | 366.8832                    | 0.0317                       | 9.0434                      | 0.1058                              | 6.6382                      |
| 120     | 3.8286             | 0.1278                | 8.1371           | 290.9519                    | 0.0308                       | 8.7617                      | 0.1230                              | 7.0609                      |
| 130     | 3.7611             | 0.1257                | 7.1309           | 235.1049                    | 0.0300                       | 8.5128                      | 0.1411                              | 7.4686                      |
| 140     | 3.7014             | 0.1239                | 6.4509           | 193.0954                    | 0.0292                       | 8.2908                      | 0.1603                              | 7.8632                      |
| 150     | 3.6480             | 0.1223                | 5.9719           | 160.8755                    | 0.0285                       | 8.0915                      | 0.1804                              | 8.2463                      |
| 160     | 3.5998             | 0.1208                | 5.6215           | 135.7419                    | 0.0279                       | 7.9112                      | 0.2014                              | 8.6191                      |
| 170     | 3.5559             | 0.1195                | 5.3565           | 115.8418                    | 0.0273                       | 7.7471                      | 0.2232                              | 8.9827                      |
| 180     | 3.5155             | 0.1183                | 5.1498           | 99.8758                     | 0.0268                       | 7.5970                      | 0.2460                              | 9.3380                      |
| 190     | 3.4783             | 0.1172                | 4.9842           | 86.9140                     | 0.0263                       | 7.4590                      | 0.2697                              | 9.6858                      |
| 200     | 3.4437             | 0.1161                | 4.8484           | 76.2787                     | 0.0259                       | 7.3316                      | 0.2942                              | 10.0266                     |
| 210     | 3.4114             | 0.1152                | 4.7346           | 67.4682                     | 0.0255                       | 7.2135                      | 0.3195                              | 10.3610                     |
| 220     | 3.3811             | 0.1143                | 4.6375           | 60.1054                     | 0.0251                       | 7.1036                      | 0.3456                              | 10.6896                     |
| 230     | 3.3526             | 0.1134                | 4.5533           | 53.9032                     | 0.0247                       | 7.0010                      | 0.3726                              | 11.0128                     |
| 240     | 3.3256             | 0.1126                | 4.4793           | 48.6403                     | 0.0244                       | 6.9048                      | 0.4004                              | 11.3309                     |
| 250     | 3.3001             | 0.1118                | 4.4135           | 44.1443                     | 0.0240                       | 6.8146                      | 0.4290                              | 11.6442                     |
| 260     | 3.2759             | 0.1111                | 4.3543           | 40.2795                     | 0.0237                       | 6.7295                      | 0.4583                              | 11.9531                     |
| 270     | 3.2529             | 0.1104                | 4.3006           | 36.9382                     | 0.0234                       | 6.6492                      | 0.4885                              | 12.2578                     |
| 280     | 3.2308             | 0.1097                | 4.2516           | 34.0339                     | 0.0232                       | 6.5733                      | 0.5194                              | 12.5586                     |
| 290     | 3.2098             | 0.1091                | 4.2064           | 31.4967                     | 0.0229                       | 6.5012                      | 0.5510                              | 12.8557                     |
| 300     | 3.1896             | 0.1085                | 4.1646           | 29.2701                     | 0.0227                       | 6.4328                      | 0.5834                              | 13.1493                     |
| 325     | 3.1426             | 0.1070                | 4.0722           | 24.7756                     | 0.0221                       | 6.2755                      | 0.6677                              | 13.8690                     |
| 350     | 3.0997             | 0.1057                | 3.9930           | 21.4175                     | 0.0216                       | 6.1351                      | 0.7565                              | 14.5704                     |
| 375     | 3.0604             | 0.1045                | 3.9238           | 18.8541                     | 0.0211                       | 6.0085                      | 0.8498                              | 15.2552                     |
| 400     | 3.0240             | 0.1034                | 3.8626           | 16.8603                     | 0.0207                       | 5.8936                      | 0.9475                              | 15.9254                     |
| 425     | 2.9902             | 0.1024                | 3.8076           | 15.2836                     | 0.0203                       | 5.7886                      | 1.0494                              | 16.5821                     |
| 450     | 2.9586             | 0.1014                | 3.7579           | 14.0183                     | 0.0199                       | 5.6920                      | 1.1556                              | 17.2266                     |
| 475     | 2.9289             | 0.1005                | 3.7126           | 12.9892                     | 0.0196                       | 5.6028                      | 1.2659                              | 17.8599                     |
| 500     | 2.9010             | 0.0996                | 3.6709           | 12.1422                     | 0.0193                       | 5.5200                      | 1.3803                              | 18.4829                     |
| 525     | 2.8746             | 0.0988                | 3.6324           | 11.4373                     | 0.0190                       | 5.4427                      | 1.4987                              | 19.0962                     |
| 550     | 2.8495             | 0.0980                | 3.5967           | 10.8448                     | 0.0188                       | 5.3704                      | 1.6212                              | 19.7007                     |
| 575     | 2.8258             | 0.0973                | 3.5634           | 10.3423                     | 0.0185                       | 5.3026                      | 1.7475                              | 20.2968                     |
| 600     | 2.8031             | 0.0966                | 3.5323           | 9.9123                      | 0.0183                       | 5.2387                      | 1.8778                              | 20.8850                     |
| 625     | 2.7815             | 0.0959                | 3.5031           | 9.5415                      | 0.0181                       | 5.1783                      | 2.0119                              | 21.4659                     |
| 650     | 2.7608             | 0.0953                | 3.4756           | 9.2194                      | 0.0178                       | 5.1212                      | 2.1498                              | 22.0399                     |
| 675     | 2.7410             | 0.0946                | 3.4496           | 8.9377                      | 0.0177                       | 5.0670                      | 2.2914                              | 22.6072                     |
| 700     | 2.7219             | 0.0940                | 3.4250           | 8.6897                      | 0.0175                       | 5.0154                      | 2.4368                              | 23.1683                     |
| 725     | 2.7037             | 0.0935                | 3.4016           | 8.4702                      | 0.0173                       | 4.9663                      | 2.5859                              | 23.7236                     |
| 750     | 2.6860             | 0.0929                | 3.3794           | 8.2746                      | 0.0171                       | 4.9194                      | 2.7386                              | 24.2732                     |
| 775     | 2.6691             | 0.0924                | 3.3581           | 8.0996                      | 0.0170                       | 4.8745                      | 2.8950                              | 24.8175                     |
| 800     | 2.6527             | 0.0919                | 3.3378           | 7.9420                      | 0.0168                       | 4.8315                      | 3.0549                              | 25.3568                     |
| 825     | 2.6369             | 0.0913                | 3.3184           | 7.7996                      | 0.0166                       | 4.7901                      | 3.2185                              | 25.8914                     |
| 850     | 2.6215             | 0.0909                | 3.2997           | 7.6703                      | 0.0165                       | 4.7504                      | 3.3855                              | 26.4216                     |
| 875     | 2.6067             | 0.0904                | 3.2816           | 7.5524                      | 0.0164                       | 4.7121                      | 3.5561                              | 26.9477                     |
| 900     | 2.5923             | 0.0899                | 3.2642           | 7.4444                      | 0.0162                       | 4.6751                      | 3.7302                              | 27.4701                     |
| 925     | 2.5783             | 0.0895                | 3.2473           | 7.3451                      | 0.0161                       | 4.6393                      | 3.9078                              | 27.9892                     |
| 950     | 2.5647             | 0.0890                | 3.2309           | 7.2535                      | 0.0160                       | 4.6046                      | 4.0889                              | 28.5053                     |
| 975     | 2.5515             | 0.0886                | 3.2149           | 7.1687                      | 0.0158                       | 4.5709                      | 4.2734                              | 29.0188                     |
| 1000    | 2.5386             | 0.0882                | 3.1993           | 7.0900                      | 0.0157                       | 4.5380                      | 4.4614                              | 29.5302                     |

**Table S5.** Calculated cross-sections, viscosity  $\eta_{12}$ , and the pair diffusion coefficients  $D_{12}$  as a function of temperature for He...HBr complex calculated using aQz basis set. All cross sections are in  $\text{\AA}^2$ .

| $T$ (K) | $\mathfrak{S}^1_D$ | $\mathfrak{S}^2_\eta$ | $\mathfrak{S}_T$ | $\mathfrak{S}_{DPR}$ | $\mathfrak{S}_{prod}$ | $\mathfrak{S}_{ROT}$ | $D_{12}(\text{cm}^2.\text{s}^{-1})$ | $\eta_{12}(\mu\text{Pa.s})$ |
|---------|--------------------|-----------------------|------------------|----------------------|-----------------------|----------------------|-------------------------------------|-----------------------------|
| 50      | 4.8275             | 0.1588                | 8.1413           | 10.4709              | 0.0374                | 10.8571              | 0.0262                              | 3.6664                      |
| 75      | 4.2718             | 0.1414                | 6.4511           | 9.3719               | 0.0335                | 9.5726               | 0.0545                              | 5.0417                      |
| 100     | 3.9793             | 0.1325                | 5.6318           | 8.8474               | 0.0307                | 8.7038               | 0.0900                              | 6.2157                      |
| 125     | 3.7891             | 0.1267                | 5.1467           | 8.5372               | 0.0286                | 8.0898               | 0.1321                              | 7.2659                      |
| 150     | 3.6503             | 0.1225                | 4.8226           | 8.3237               | 0.0270                | 7.6298               | 0.1802                              | 8.2316                      |
| 175     | 3.5416             | 0.1192                | 4.5883           | 8.1604               | 0.0258                | 7.2691               | 0.2341                              | 9.1354                      |
| 200     | 3.4524             | 0.1166                | 4.4093           | 8.0263               | 0.0247                | 6.9762               | 0.2934                              | 9.9912                      |
| 225     | 3.3769             | 0.1143                | 4.2668           | 7.9109               | 0.0239                | 6.7321               | 0.3579                              | 10.8085                     |
| 250     | 3.3115             | 0.1123                | 4.1499           | 7.8084               | 0.0231                | 6.5243               | 0.4275                              | 11.5938                     |
| 275     | 3.2537             | 0.1106                | 4.0516           | 7.7157               | 0.0224                | 6.3444               | 0.5020                              | 12.3520                     |
| 300     | 3.2020             | 0.1090                | 3.9673           | 7.6306               | 0.0218                | 6.1864               | 0.5812                              | 13.0869                     |
| 325     | 3.1552             | 0.1076                | 3.8940           | 7.5516               | 0.0213                | 6.0462               | 0.6651                              | 13.8014                     |
| 350     | 3.1124             | 0.1063                | 3.8293           | 7.4778               | 0.0209                | 5.9204               | 0.7535                              | 14.4978                     |
| 375     | 3.0731             | 0.1051                | 3.7716           | 7.4086               | 0.0204                | 5.8066               | 0.8463                              | 15.1780                     |
| 400     | 3.0366             | 0.1039                | 3.7196           | 7.3432               | 0.0200                | 5.7028               | 0.9435                              | 15.8436                     |
| 425     | 3.0026             | 0.1029                | 3.6725           | 7.2813               | 0.0197                | 5.6077               | 1.0451                              | 16.4959                     |
| 450     | 2.9707             | 0.1019                | 3.6295           | 7.2226               | 0.0193                | 5.5199               | 1.1508                              | 17.1361                     |
| 475     | 2.9407             | 0.1010                | 3.5900           | 7.1667               | 0.0190                | 5.4385               | 1.2608                              | 17.7652                     |
| 500     | 2.9124             | 0.1002                | 3.5535           | 7.1134               | 0.0187                | 5.3627               | 1.3748                              | 18.3839                     |
| 525     | 2.8856             | 0.0993                | 3.5198           | 7.0625               | 0.0184                | 5.2919               | 1.4930                              | 18.9930                     |
| 550     | 2.8600             | 0.0986                | 3.4884           | 7.0138               | 0.0182                | 5.2254               | 1.6152                              | 19.5933                     |
| 575     | 2.8357             | 0.0978                | 3.4592           | 6.9671               | 0.0179                | 5.1628               | 1.7414                              | 20.1853                     |
| 600     | 2.8124             | 0.0971                | 3.4320           | 6.9223               | 0.0177                | 5.1037               | 1.8716                              | 20.7696                     |
| 625     | 2.7900             | 0.0964                | 3.4066           | 6.8793               | 0.0175                | 5.0478               | 2.0057                              | 21.3467                     |
| 650     | 2.7685             | 0.0958                | 3.3829           | 6.8379               | 0.0172                | 4.9948               | 2.1438                              | 21.9170                     |
| 675     | 2.7478             | 0.0952                | 3.3608           | 6.7982               | 0.0170                | 4.9444               | 2.2857                              | 22.4810                     |
| 700     | 2.7278             | 0.0946                | 3.3403           | 6.7600               | 0.0168                | 4.8964               | 2.4316                              | 23.0391                     |
| 725     | 2.7085             | 0.0940                | 3.3211           | 6.7232               | 0.0167                | 4.8507               | 2.5813                              | 23.5917                     |
| 750     | 2.6897             | 0.0934                | 3.3033           | 6.6878               | 0.0165                | 4.8070               | 2.7349                              | 24.1392                     |
| 775     | 2.6716             | 0.0929                | 3.2869           | 6.6537               | 0.0163                | 4.7653               | 2.8923                              | 24.6820                     |
| 800     | 2.6539             | 0.0923                | 3.2717           | 6.6208               | 0.0162                | 4.7253               | 3.0536                              | 25.2205                     |
| 825     | 2.6367             | 0.0918                | 3.2577           | 6.5892               | 0.0160                | 4.6869               | 3.2187                              | 25.7550                     |
| 850     | 2.6199             | 0.0913                | 3.2448           | 6.5588               | 0.0159                | 4.6501               | 3.3877                              | 26.2858                     |
| 875     | 2.6035             | 0.0908                | 3.2330           | 6.5295               | 0.0158                | 4.6148               | 3.5605                              | 26.8135                     |
| 900     | 2.5875             | 0.0904                | 3.2222           | 6.5012               | 0.0157                | 4.5807               | 3.7371                              | 27.3384                     |
| 925     | 2.5718             | 0.0899                | 3.2124           | 6.4741               | 0.0156                | 4.5479               | 3.9177                              | 27.8609                     |
| 950     | 2.5565             | 0.0894                | 3.2034           | 6.4480               | 0.0155                | 4.5161               | 4.1020                              | 28.3814                     |
| 975     | 2.5414             | 0.0890                | 3.1952           | 6.4229               | 0.0154                | 4.4854               | 4.2903                              | 28.9005                     |
| 1000    | 2.5266             | 0.0885                | 3.1877           | 6.3987               | 0.0153                | 4.4557               | 4.4824                              | 29.4185                     |

**Table S6.**  $D_{12}$  values calculated from classical kinetic theory using the Mason-Monchick approximation.

| T(K) | $D_{12}(\text{cm}^2.\text{s}^{-1})$ | T(K) | $D_{12}(\text{cm}^2.\text{s}^{-1})$ | T(K) | $D_{12}(\text{cm}^2.\text{s}^{-1})$ | T(K) | $D_{12}(\text{cm}^2.\text{s}^{-1})$ |
|------|-------------------------------------|------|-------------------------------------|------|-------------------------------------|------|-------------------------------------|
| 50   | 0.0234                              | 290  | 0.5351                              | 530  | 1.4797                              | 770  | 2.7615                              |
| 55   | 0.0281                              | 295  | 0.5509                              | 535  | 1.5032                              | 775  | 2.7913                              |
| 60   | 0.0332                              | 300  | 0.5668                              | 540  | 1.5268                              | 780  | 2.8213                              |
| 65   | 0.0386                              | 305  | 0.5829                              | 545  | 1.5506                              | 785  | 2.8514                              |
| 70   | 0.0443                              | 310  | 0.5992                              | 550  | 1.5745                              | 790  | 2.8816                              |
| 75   | 0.0503                              | 315  | 0.6156                              | 555  | 1.5986                              | 795  | 2.9120                              |
| 80   | 0.0566                              | 320  | 0.6322                              | 560  | 1.6228                              | 800  | 2.9424                              |
| 85   | 0.0632                              | 325  | 0.6490                              | 565  | 1.6472                              | 805  | 2.9730                              |
| 90   | 0.0701                              | 330  | 0.6660                              | 570  | 1.6717                              | 810  | 3.0037                              |
| 95   | 0.0773                              | 335  | 0.6832                              | 575  | 1.6963                              | 815  | 3.0345                              |
| 100  | 0.0847                              | 340  | 0.7005                              | 580  | 1.7211                              | 820  | 3.0654                              |
| 105  | 0.0924                              | 345  | 0.7180                              | 585  | 1.7460                              | 825  | 3.0965                              |
| 110  | 0.1004                              | 350  | 0.7357                              | 590  | 1.7711                              | 830  | 3.1277                              |
| 115  | 0.1086                              | 355  | 0.7535                              | 595  | 1.7963                              | 835  | 3.1590                              |
| 120  | 0.1171                              | 360  | 0.7716                              | 600  | 1.8216                              | 840  | 3.1904                              |
| 125  | 0.1258                              | 365  | 0.7897                              | 605  | 1.8471                              | 845  | 3.2219                              |
| 130  | 0.1348                              | 370  | 0.8081                              | 610  | 1.8727                              | 850  | 3.2535                              |
| 135  | 0.1440                              | 375  | 0.8266                              | 615  | 1.8984                              | 855  | 3.2853                              |
| 140  | 0.1535                              | 380  | 0.8453                              | 620  | 1.9243                              | 860  | 3.3171                              |
| 145  | 0.1631                              | 385  | 0.8642                              | 625  | 1.9503                              | 865  | 3.3491                              |
| 150  | 0.1730                              | 390  | 0.8832                              | 630  | 1.9765                              | 870  | 3.3812                              |
| 155  | 0.1832                              | 395  | 0.9024                              | 635  | 2.0027                              | 875  | 3.4134                              |
| 160  | 0.1935                              | 400  | 0.9217                              | 640  | 2.0292                              | 880  | 3.4457                              |
| 165  | 0.2041                              | 405  | 0.9412                              | 645  | 2.0557                              | 885  | 3.4781                              |
| 170  | 0.2149                              | 410  | 0.9609                              | 650  | 2.0824                              | 890  | 3.5107                              |
| 175  | 0.2259                              | 415  | 0.9807                              | 655  | 2.1092                              | 895  | 3.5433                              |
| 180  | 0.2371                              | 420  | 1.0007                              | 660  | 2.1362                              | 900  | 3.5761                              |
| 185  | 0.2486                              | 425  | 1.0208                              | 665  | 2.1632                              | 905  | 3.6090                              |
| 190  | 0.2602                              | 430  | 1.0412                              | 670  | 2.1905                              | 910  | 3.6420                              |
| 195  | 0.2721                              | 435  | 1.0616                              | 675  | 2.2178                              | 915  | 3.6751                              |
| 200  | 0.2841                              | 440  | 1.0823                              | 680  | 2.2453                              | 920  | 3.7083                              |
| 205  | 0.2964                              | 445  | 1.1030                              | 685  | 2.2729                              | 925  | 3.7416                              |
| 210  | 0.3089                              | 450  | 1.1240                              | 690  | 2.3006                              | 930  | 3.7751                              |
| 215  | 0.3216                              | 455  | 1.1451                              | 695  | 2.3285                              | 935  | 3.8086                              |
| 220  | 0.3345                              | 460  | 1.1663                              | 700  | 2.3565                              | 940  | 3.8423                              |
| 225  | 0.3475                              | 465  | 1.1877                              | 705  | 2.3846                              | 945  | 3.8760                              |
| 230  | 0.3608                              | 470  | 1.2093                              | 710  | 2.4128                              | 950  | 3.9099                              |
| 235  | 0.3743                              | 475  | 1.2310                              | 715  | 2.4412                              | 955  | 3.9439                              |
| 240  | 0.3880                              | 480  | 1.2529                              | 720  | 2.4697                              | 960  | 3.9780                              |
| 245  | 0.4018                              | 485  | 1.2749                              | 725  | 2.4983                              | 965  | 4.0122                              |
| 250  | 0.4159                              | 490  | 1.2970                              | 730  | 2.5270                              | 970  | 4.0465                              |
| 255  | 0.4301                              | 495  | 1.3193                              | 735  | 2.5559                              | 975  | 4.0809                              |
| 260  | 0.4446                              | 500  | 1.3418                              | 740  | 2.5849                              | 980  | 4.1154                              |
| 265  | 0.4592                              | 505  | 1.3644                              | 745  | 2.6140                              | 985  | 4.1501                              |
| 270  | 0.4740                              | 510  | 1.3872                              | 750  | 2.6433                              | 990  | 4.1848                              |
| 275  | 0.4890                              | 515  | 1.4101                              | 755  | 2.6726                              | 995  | 4.2196                              |
| 280  | 0.5042                              | 520  | 1.4332                              | 760  | 2.7021                              | 1000 | 4.2546                              |
| 285  | 0.5196                              | 525  | 1.4564                              | 765  | 2.7317                              |      |                                     |

**Table S7.**  $\eta_{12}$  values calculated from classical kinetic theory using the Mason-Monchick approximation.

| T(K) | $\eta_{12}(\mu\text{Pa.s})$ | T(K) | $\eta_{12}(\mu\text{Pa.s})$ | T(K) | $\eta_{12}(\mu\text{Pa.s})$ | T(K) | $\eta_{12}(\mu\text{Pa.s})$ |
|------|-----------------------------|------|-----------------------------|------|-----------------------------|------|-----------------------------|
| 50   | 3.2813                      | 290  | 12.7244                     | 530  | 19.1748                     | 770  | 24.7964                     |
| 55   | 3.5855                      | 295  | 12.8731                     | 535  | 19.2985                     | 775  | 24.9075                     |
| 60   | 3.8806                      | 300  | 13.0209                     | 540  | 19.4218                     | 780  | 25.0184                     |
| 65   | 4.1665                      | 305  | 13.1678                     | 545  | 19.5448                     | 785  | 25.1292                     |
| 70   | 4.4436                      | 310  | 13.3139                     | 550  | 19.6675                     | 790  | 25.2397                     |
| 75   | 4.7124                      | 315  | 13.4593                     | 555  | 19.7899                     | 795  | 25.3500                     |
| 80   | 4.9735                      | 320  | 13.6039                     | 560  | 19.9120                     | 800  | 25.4600                     |
| 85   | 5.2273                      | 325  | 13.7477                     | 565  | 20.0338                     | 805  | 25.5699                     |
| 90   | 5.4743                      | 330  | 13.8908                     | 570  | 20.1553                     | 810  | 25.6796                     |
| 95   | 5.7151                      | 335  | 14.0332                     | 575  | 20.2764                     | 815  | 25.7890                     |
| 100  | 5.9500                      | 340  | 14.1750                     | 580  | 20.3973                     | 820  | 25.8983                     |
| 105  | 6.1795                      | 345  | 14.3160                     | 585  | 20.5179                     | 825  | 26.0073                     |
| 110  | 6.4040                      | 350  | 14.4564                     | 590  | 20.6382                     | 830  | 26.1161                     |
| 115  | 6.6238                      | 355  | 14.5962                     | 595  | 20.7582                     | 835  | 26.2248                     |
| 120  | 6.8392                      | 360  | 14.7353                     | 600  | 20.8779                     | 840  | 26.3332                     |
| 125  | 7.0505                      | 365  | 14.8739                     | 605  | 20.9974                     | 845  | 26.4414                     |
| 130  | 7.2579                      | 370  | 15.0118                     | 610  | 21.1166                     | 850  | 26.5494                     |
| 135  | 7.4618                      | 375  | 15.1492                     | 615  | 21.2354                     | 855  | 26.6573                     |
| 140  | 7.6623                      | 380  | 15.2860                     | 620  | 21.3541                     | 860  | 26.7649                     |
| 145  | 7.8597                      | 385  | 15.4222                     | 625  | 21.4724                     | 865  | 26.8723                     |
| 150  | 8.0541                      | 390  | 15.5579                     | 630  | 21.5905                     | 870  | 26.9795                     |
| 155  | 8.2456                      | 395  | 15.6931                     | 635  | 21.7083                     | 875  | 27.0865                     |
| 160  | 8.4345                      | 400  | 15.8277                     | 640  | 21.8259                     | 880  | 27.1934                     |
| 165  | 8.6209                      | 405  | 15.9619                     | 645  | 21.9432                     | 885  | 27.3000                     |
| 170  | 8.8048                      | 410  | 16.0955                     | 650  | 22.0602                     | 890  | 27.4064                     |
| 175  | 8.9866                      | 415  | 16.2287                     | 655  | 22.1770                     | 895  | 27.5127                     |
| 180  | 9.1661                      | 420  | 16.3613                     | 660  | 22.2935                     | 900  | 27.6187                     |
| 185  | 9.3436                      | 425  | 16.4935                     | 665  | 22.4098                     | 905  | 27.7246                     |
| 190  | 9.5192                      | 430  | 16.6253                     | 670  | 22.5258                     | 910  | 27.8303                     |
| 195  | 9.6929                      | 435  | 16.7566                     | 675  | 22.6416                     | 915  | 27.9357                     |
| 200  | 9.8648                      | 440  | 16.8874                     | 680  | 22.7571                     | 920  | 28.0410                     |
| 205  | 10.0350                     | 445  | 17.0178                     | 685  | 22.8724                     | 925  | 28.1461                     |
| 210  | 10.2036                     | 450  | 17.1478                     | 690  | 22.9874                     | 930  | 28.2510                     |
| 215  | 10.3707                     | 455  | 17.2774                     | 695  | 23.1022                     | 935  | 28.3557                     |
| 220  | 10.5362                     | 460  | 17.4065                     | 700  | 23.2168                     | 940  | 28.4603                     |
| 225  | 10.7003                     | 465  | 17.5353                     | 705  | 23.3311                     | 945  | 28.5646                     |
| 230  | 10.8630                     | 470  | 17.6636                     | 710  | 23.4452                     | 950  | 28.6688                     |
| 235  | 11.0244                     | 475  | 17.7916                     | 715  | 23.5590                     | 955  | 28.7728                     |
| 240  | 11.1845                     | 480  | 17.9192                     | 720  | 23.6726                     | 960  | 28.8766                     |
| 245  | 11.3434                     | 485  | 18.0463                     | 725  | 23.7860                     | 965  | 28.9802                     |
| 250  | 11.5011                     | 490  | 18.1732                     | 730  | 23.8992                     | 970  | 29.0836                     |
| 255  | 11.6577                     | 495  | 18.2996                     | 735  | 24.0121                     | 975  | 29.1868                     |
| 260  | 11.8131                     | 500  | 18.4257                     | 740  | 24.1248                     | 980  | 29.2899                     |
| 265  | 11.9675                     | 505  | 18.5514                     | 745  | 24.2373                     | 985  | 29.3928                     |
| 270  | 12.1208                     | 510  | 18.6768                     | 750  | 24.3496                     | 990  | 29.4955                     |
| 275  | 12.2731                     | 515  | 18.8018                     | 755  | 24.4616                     | 995  | 29.5980                     |
| 280  | 12.4245                     | 520  | 18.9264                     | 760  | 24.5734                     | 1000 | 29.7004                     |
| 285  | 12.5749                     | 525  | 19.0508                     | 765  | 24.6850                     |      |                             |

**Table S8.** Comparison of the ab-initio PES computed at CCSDT/a5zBF level of theory with with LJ(12,6) and Vashishta force fields.

| $\theta$ | AAD%      |           | SD%       |           |
|----------|-----------|-----------|-----------|-----------|
|          | Vashishta | LJ (12-6) | Vashishta | LJ (12-6) |
| 0        | 2.1783    | 29.415    | 14.759    | 54.236    |
| 40       | 0.8299    | 26.178    | 9.1099    | 51.165    |
| 90       | 0.59071   | 52.938    | 7.6858    | 72.758    |
| 130      | 1.1951    | 57.749    | 10.932    | 75.992    |
| 180      | 4.3629    | 23.005    | 20.888    | 47.963    |

**Table S9.** Comparison of the viscosity coefficients obtained from MM, CC, LJ (12,6) and Vashishta methods for He-HBr complex at some temperatures.

| $T$  | <i>CC-a5zBF</i> | <i>CC-aQz</i> | <i>MM</i> | <i>LJ</i> | <i>Vashishta</i> |
|------|-----------------|---------------|-----------|-----------|------------------|
| 100  | 6.1967          | 6.2157        | 5.9500    | -         | -                |
| 200  | 10.0265         | 9.9912        | 9.8648    | 9.9431    | 10.0076          |
| 300  | 13.1493         | 13.0869       | 13.0209   | 13.1180   | 13.1443          |
| 400  | 15.9254         | 15.8436       | 15.8277   | 16.0250   | 15.9302          |
| 500  | 18.4829         | 18.3839       | 18.4257   | 18.4050   | 18.2441          |
| 600  | 20.8850         | 20.7696       | 20.8779   | 21.1620   | 21.0049          |
| 700  | 23.1683         | 23.0391       | 23.2168   | 22.9890   | 23.1662          |
| 800  | 25.3568         | 25.2205       | 25.4600   | 25.0240   | 25.4214          |
| 900  | 27.4701         | 27.3384       | 27.6187   | 27.3150   | 27.3765          |
| 1000 | 29.5302         | 29.4185       | 29.7004   | 29.7740   | 29.6524          |

**Table S10.** Comparison of the diffusion coefficients obtained from MM, CC, LJ(12,6) and Vashishta methods for He-HBr complex at some temperatures.

| $T$  | <i>CC-a5zBF</i> | <i>CC-aQz</i> | <i>MM</i> | <i>LJ</i> | <i>Vashishta</i> |
|------|-----------------|---------------|-----------|-----------|------------------|
| 100  | 0.089514        | 0.090001      | 0.084738  | 0.120740  | 0.115394         |
| 200  | 0.294131        | 0.293410      | 0.284146  | 0.307230  | 0.265632         |
| 300  | 0.583432        | 0.581188      | 0.566783  | 0.675410  | 0.675552         |
| 400  | 0.947456        | 0.943539      | 0.921698  | 1.112300  | 0.782145         |
| 500  | 1.380273        | 1.374846      | 1.341810  | 1.356100  | 1.370313         |
| 600  | 1.877764        | 1.871579      | 1.821597  | 2.375600  | 2.054817         |
| 700  | 2.436812        | 2.431562      | 2.356450  | 2.953400  | 2.287700         |
| 800  | 3.054944        | 3.053579      | 2.942427  | 4.011100  | 3.278650         |
| 900  | 3.730226        | 3.737142      | 3.576119  | 6.000900  | 3.663817         |
| 1000 | 4.461364        | 4.482411      | 4.254566  | 6.617900  | 5.676470         |



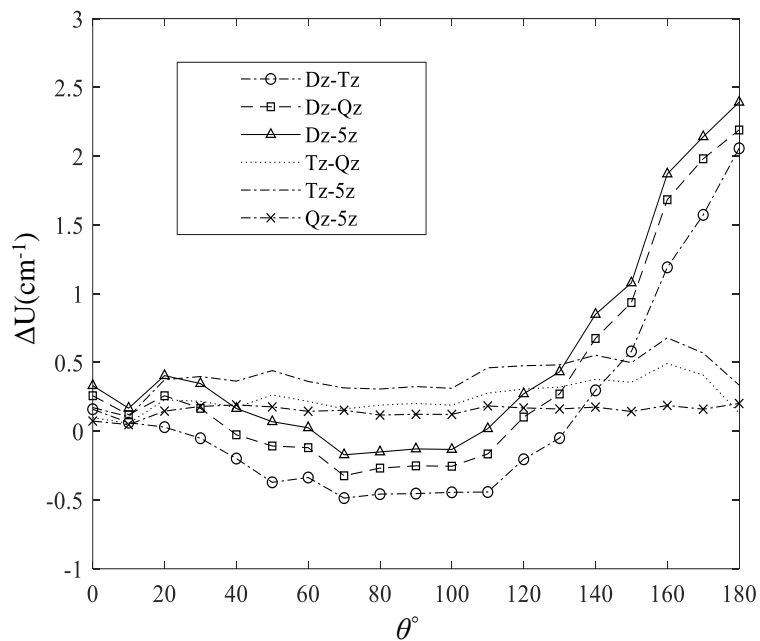

**Fig. S1.** The difference between the potential well-depth of the He...HBr PES calculated using aXzBF (X = D, T, Q, and 5) basis sets and RCCSD(T) methods. Note that, Qz-5z represents the difference between the well-depth of the potentials calculated at aQzBF and a5zBF.

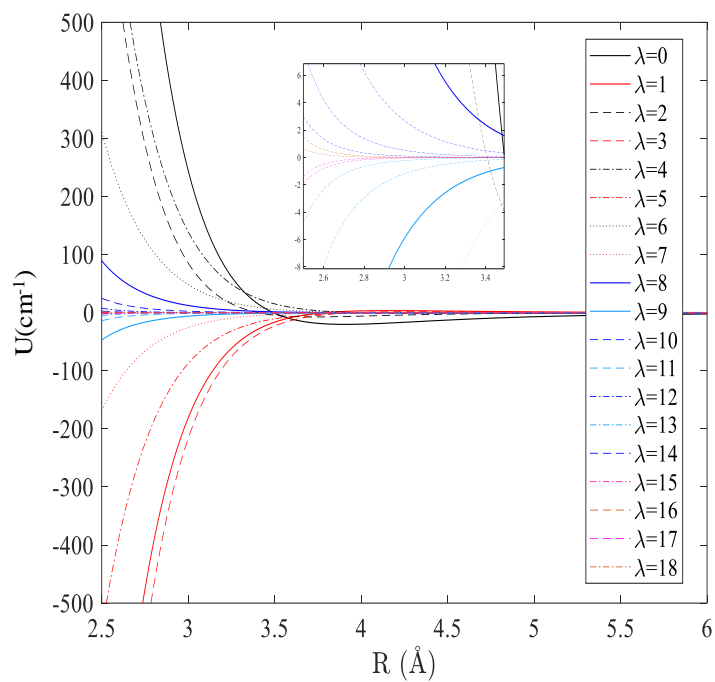

**Fig. S2.** Fitted expansion coefficients of the PES  $V_\lambda(R)$  for  $\lambda = 0-18$ .

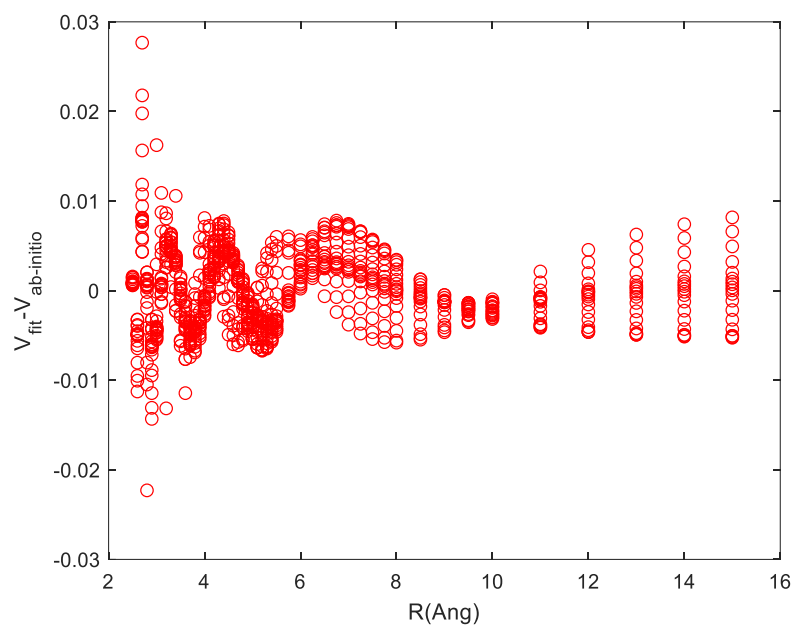

**Fig. S3.** Deviation of the ab-initio potentials and fitted values for He...HBr PES.

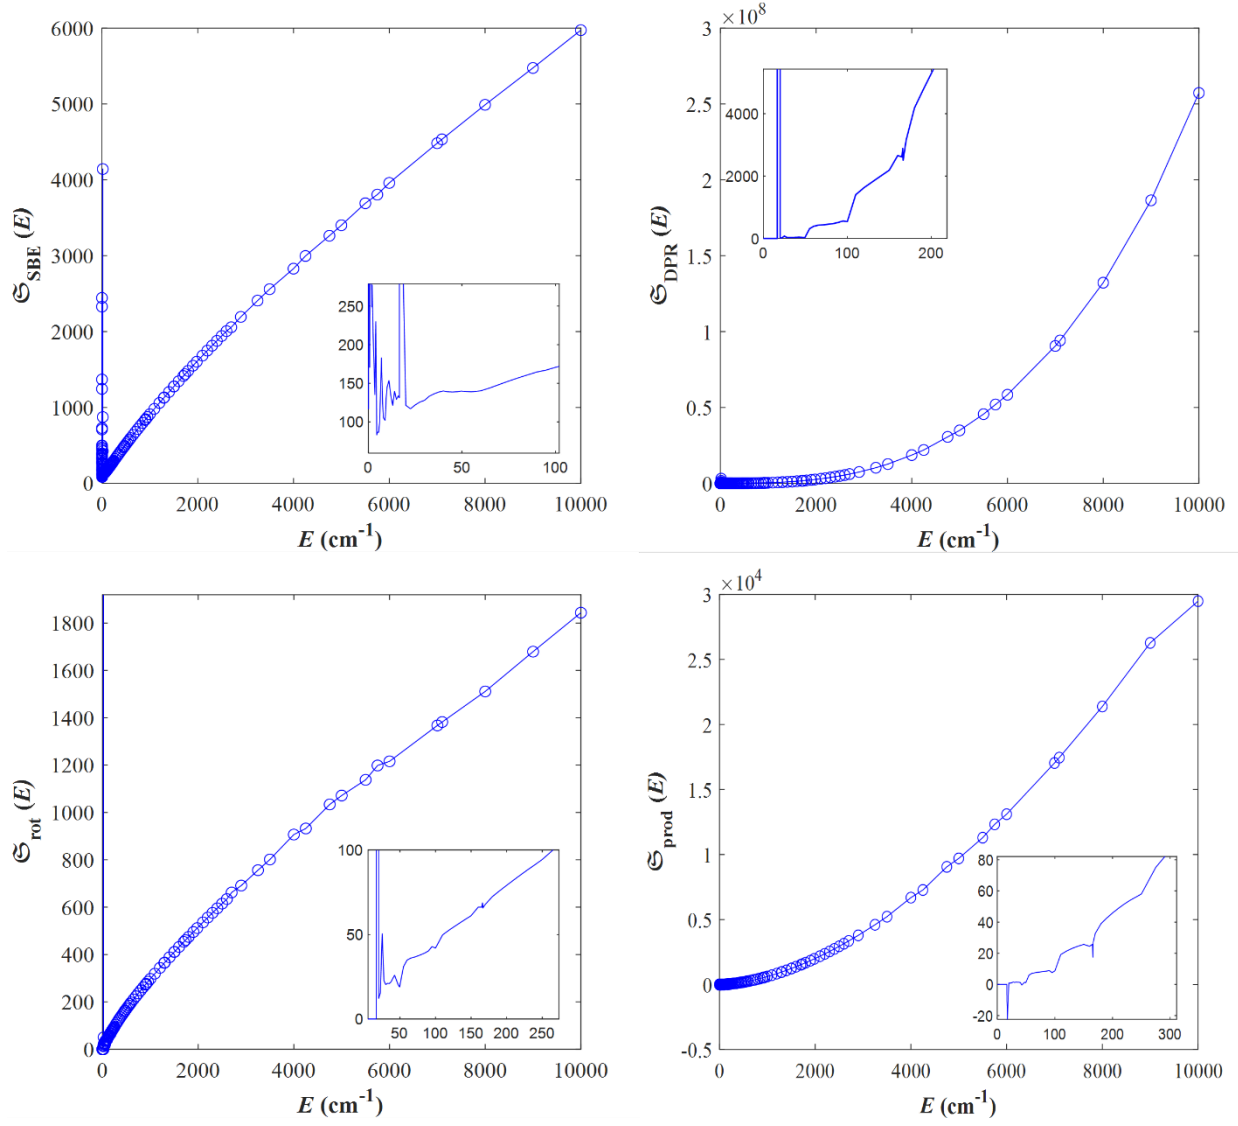

**Fig. S4.** Different SBE cross sections as function of energy.

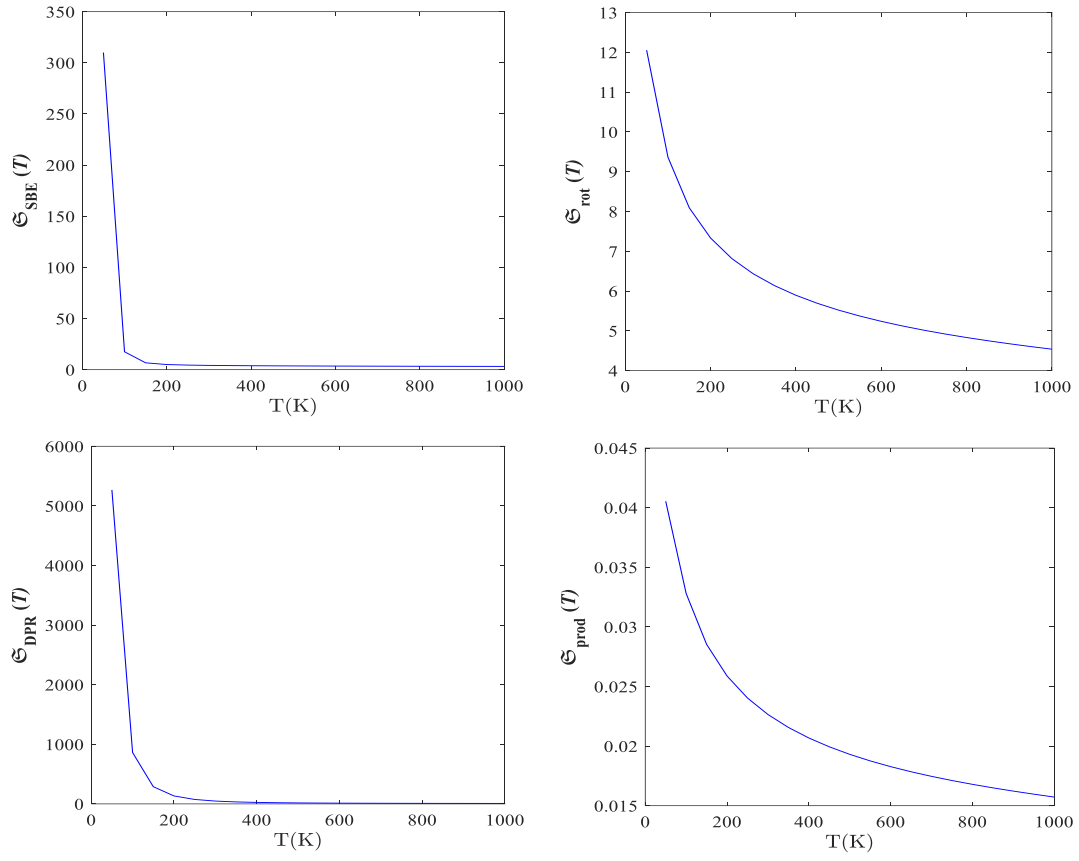

**Fig. S5.** Different SBE cross sections as function of temperature.

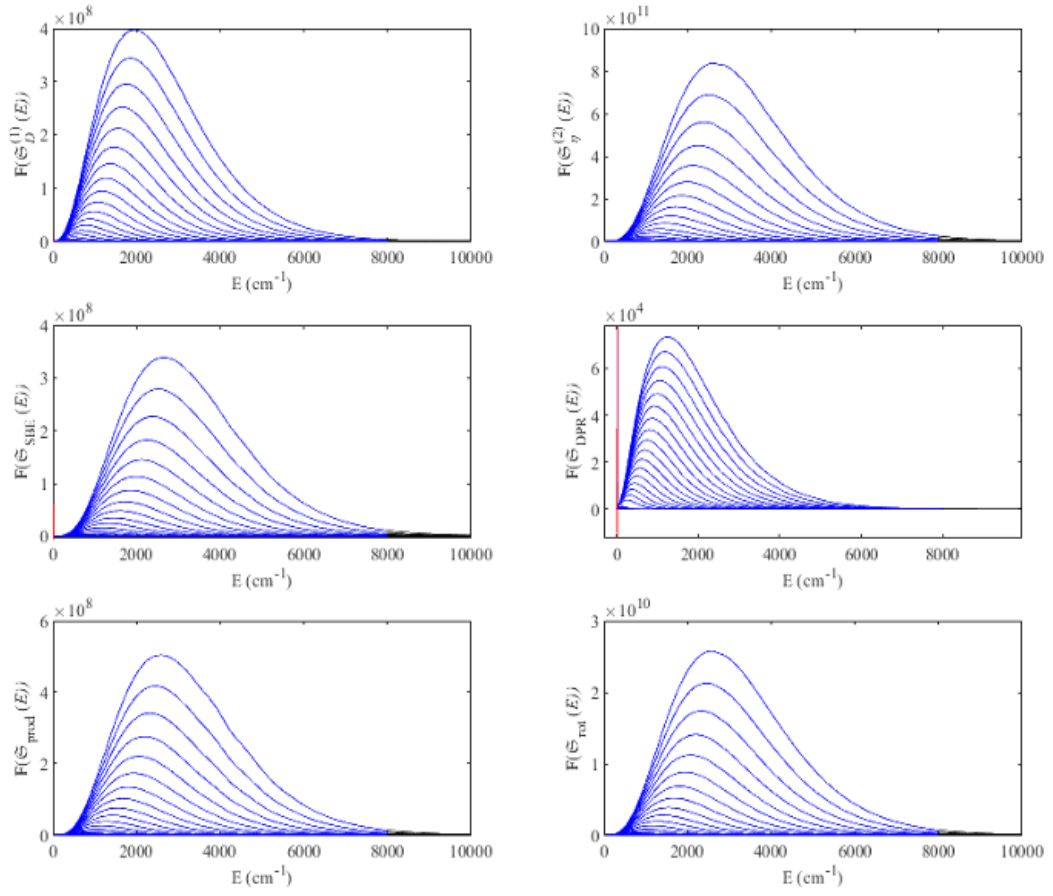

**Fig. S6.** The integration function of temperature dependent cross sections at different temperatures as function of energy. The height of the peaks increases with increasing temperature from 50 K and the highest peak belongs to the temperature of 1000 K.

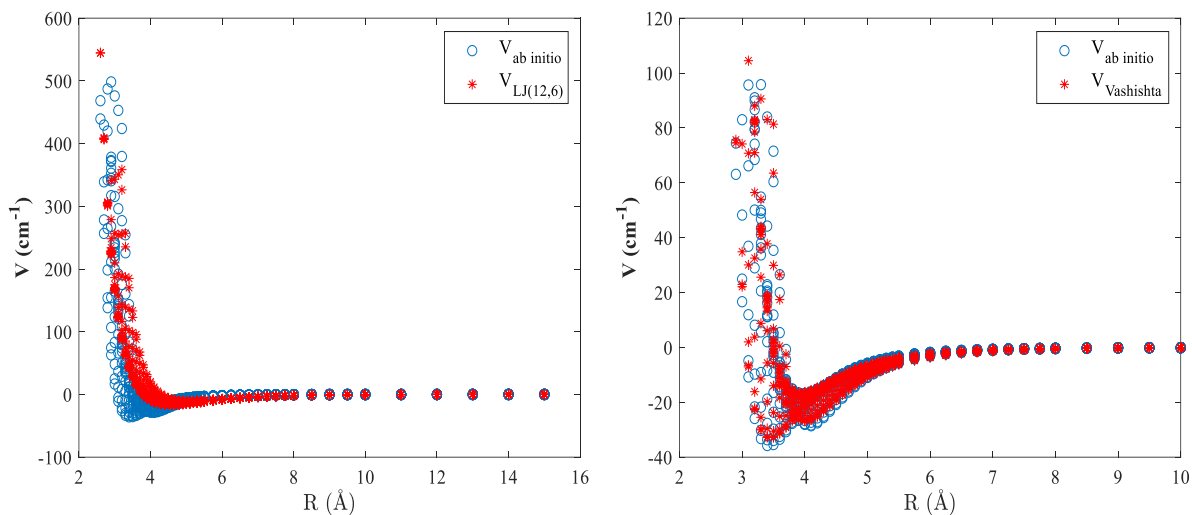

**Fig. S7.** Comparison of the ab-initio potentials with LJ(12,6) and Vashishta potential models.

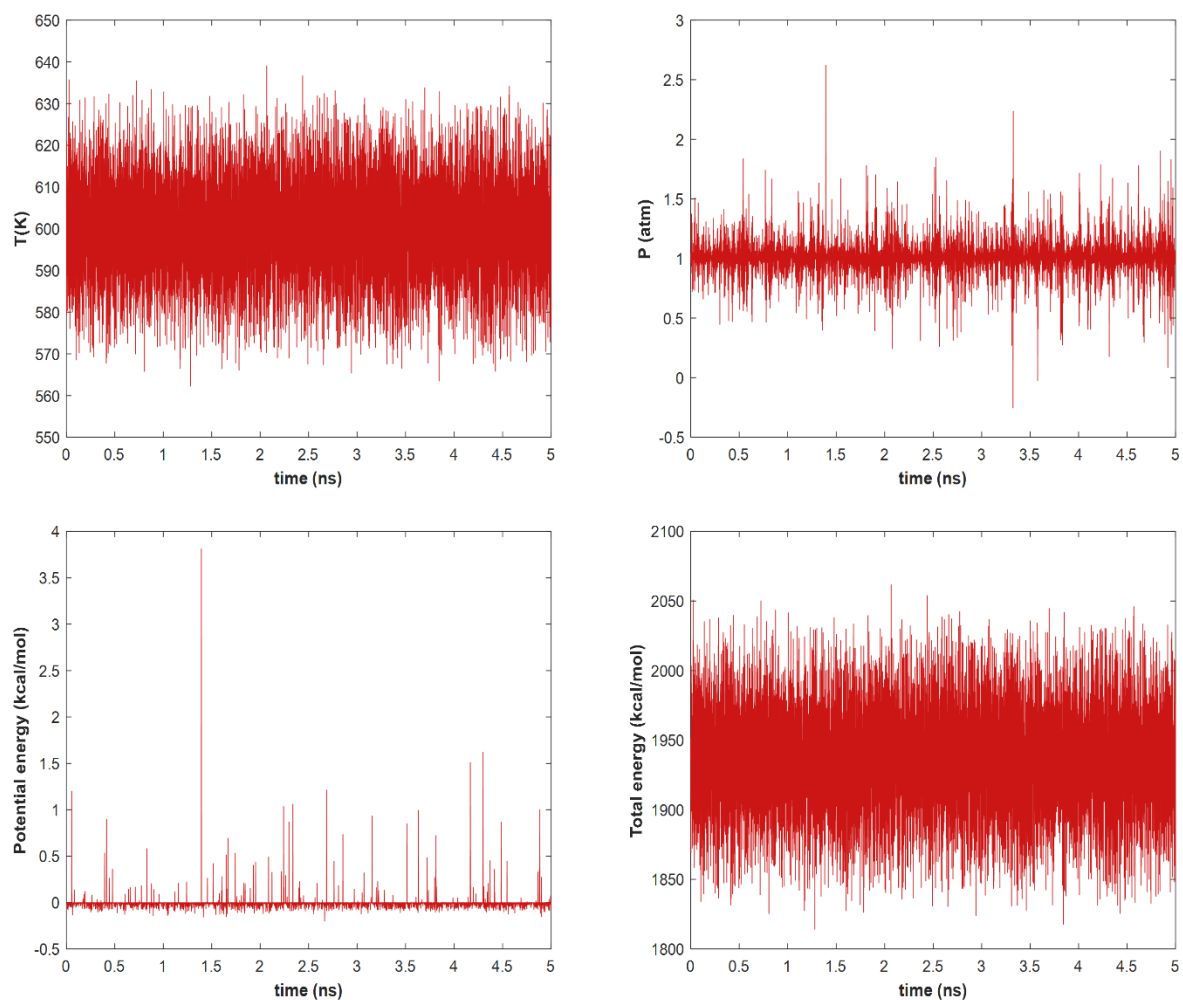

**Fig. S8.** Calculated thermodynamical parameters (temperature, pressure, potential energy, total energy) as a function of simulation time using LJ(12,6) potential at  $T = 600$  K.

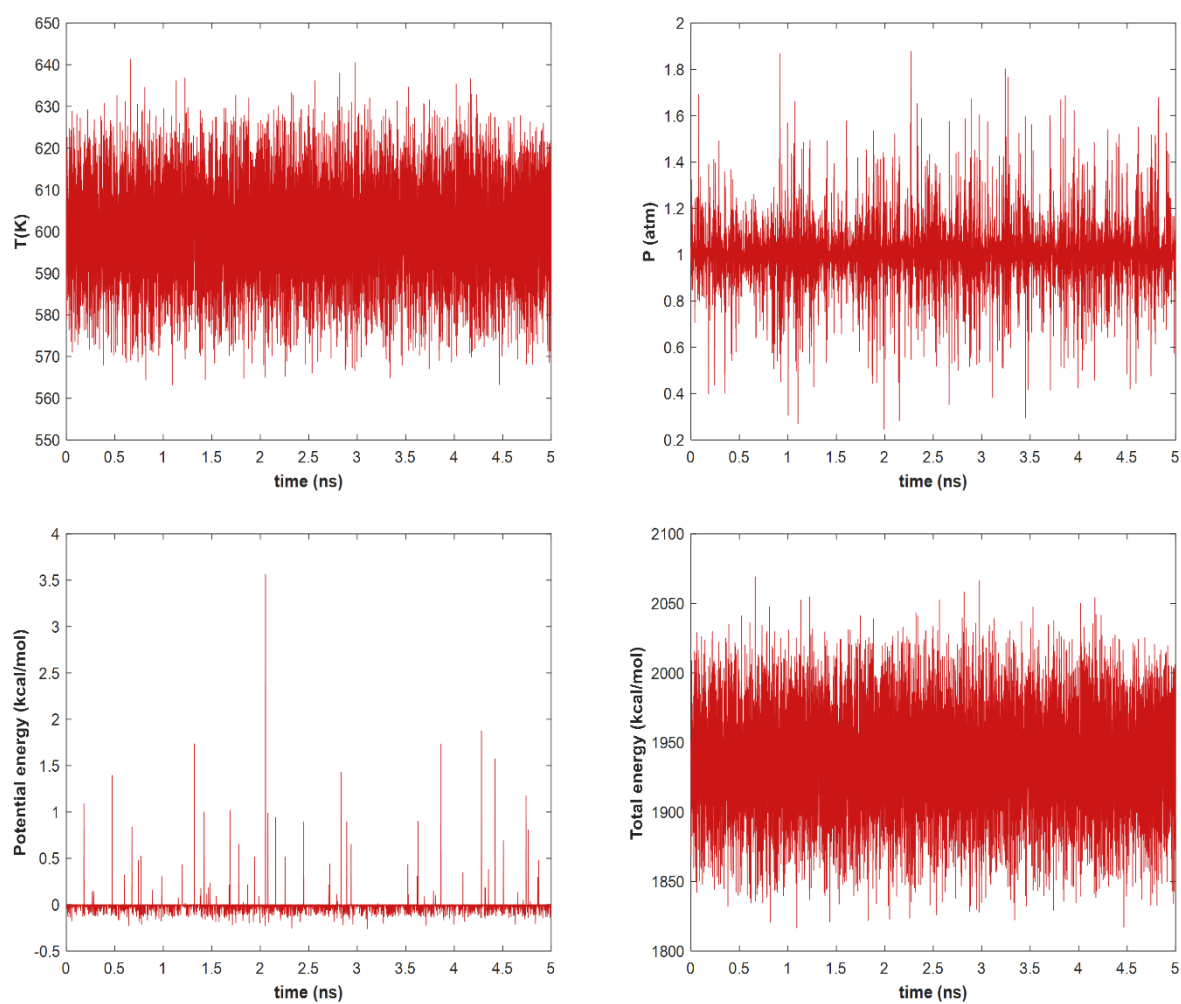

**Fig. S9.** Calculated thermodynamical parameters (temperature, pressure, potential energy, total energy) as a function of simulation time using Vashishta potential at  $T = 600$  K.

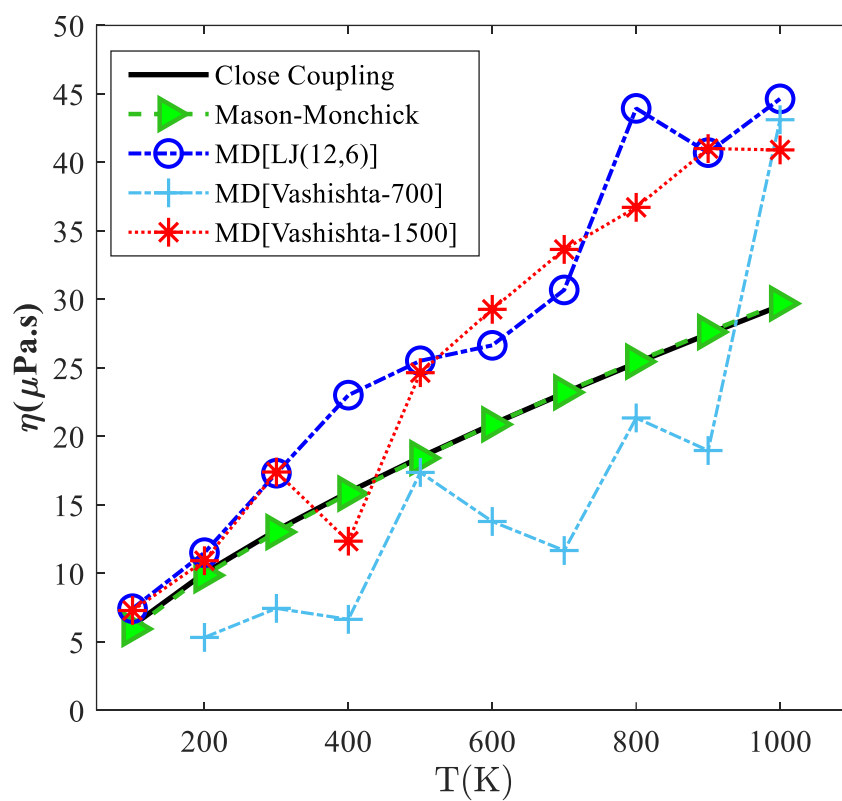

**Fig. S10.** calculated viscosity coefficient from different methods for He...HBr complex. Vashishta-700 and Vashishta-1500 represents MD simulation with time correlation length ( $\tau$ ) of 700 and 1500 fs.
